# Supplementary material
Source: publisher figshare collection journal article supplement (https://tandf.figshare.com/ndownloader/files/13564409)
Supplement: Supplementary file 1 [file 13564409]

**Appendix 1. Socio-demographic data and general health conditions**

| **Personal and health history** | | | | | | | | | |
| --- | --- | --- | --- | --- | --- | --- | --- | --- | --- |
| 1. Birthdate: | | | 2. Age: | | | | | | |
| 3. Sex: | | | 1.____Female | | | 2.____Male | | | |
| 4. Home address and commune of origin (write it): | | |  | | | | | | |
| 5. Place of work and commune (write it): | | |  | | | | | | |
| 6. Phone Number: | | |  | | | | | | |
| 7. Marital status (check with an X): | | | 1.____Married | | | 2.____Single | | | |
| 3.____Cohabitant partner | | | 4.____Widow | | | |
| 5.____Separate or Divorced | | | | | | |
| 8. Do you work as a seasonal worker or an agricultural worker? (check with an X): | | | 1.____Yes | | | 2.____No | | | |
| 9. Does your partner work on farming? (check with an X): | | | 1. ____Yes | | | 2.____No | | | |
| 10. What level of education do you have? (check with an X): | | | 1.____ Illiterate | | | 2.____Incomplete Elementary | | | |
| 3.____Elementary Complete | | | 4.____Incomplete High school | | | |
| 5.____High School complete | | | 6.____Technical studies | | | |
| 7.____Incomplete College | | | 8.____College complete | | | |
| 11. What is the approximate family income? (Write): | | | | | | | | | |
| 12. How many people (children and adults) live in the home? (Write): | | | | | | | | | |
| 13. Do you have a mental, physical, sensory or psychiatric disability? (check with an X): | | | | | | 1.____Yes | | | 2.____No |
| 14. If you are a woman, are you pregnant? (check with an X): | | | | | | 1.____Yes | | | 2.____No |
| 15. Drug use (check with an X): | | | | | | 1.____Yes | | | 2.____No |
| 16. Do you have some of the following health conditions? (check with an X): | | | | | | | | | |
| 1.____Anemia | 2.___Diabetes | 3.____Kidney damage | 4.___Liver Damage | 5.____Epilepsy | | | 6.____Skin allergy or dermatosis | | |
| 7.____Asthma | 8.___Cancer | 9.__Depression | 10.___Hypertension | | 11.___Heart Disease | | | 12.___Anxiety | |
| 17. Drink alcohol? (check with an X): | | | 0.____No 1.____ Yes How many drinks a week?: | | | | | | |
| 18. Do you smoke? (check with an X): | | | 0.____No 1.____ Yes How many cigarettes a week?: | | | | | | |
| 19. Do you have children with congenital malformations? (check with an X): | | | 1.____Yes 0.____No | | | | | | |
| 20. Are you an agricultural worker or work in the field? (check with an X): | | | 1.____Yes 0.____No | | | | | | |
| 21. What is your healthcare plan? (check with an X): | | | 1.____Government healthcare  2.____Private Insurer  3.____None  4.____Do not Know  5.____Other.  ¿Which one?___________________ | | | | | | |
| 22. Are you covered by a workplace safety and insurance agency? (check with an X): | | | 0.___Yes  1.___No  2.___Do not know | | | | | | |
| 23. If you are an agricultural worker, have you been given acetylcholinesterase tests in your work in the past year?(check with an X): | | | 0.____Not applicable  1.___Yes  2.___No | | | | | | |
| 24. What were the results of the tests? (check with an X):: | | | 0.____Not applicable  1.____Normal  2.____Abnormal report  3.____Did not receive results | | | | | | |
| 25. During the last period that you were exposed to OP pesticides for your agricultural work, did you ever present any of the following symptoms or signs? (check with an X): | | | | | | | | | |
| 1.____Dizziness | 2.___Nausea | 3.____Fatigue | 4.___Vomiting | 5.____Headache | | | 6.____Abdominal pain | | |
| 7.____Diarrhea | 8.___Shortness of breath | 9.___Leg weakness and/or cramps | 10.___Skin injuries | | 11.___Insomnia | | | 12.___Night sweats | |
| 13.____Blurry vision | 14.___Salivation | 15.___Has been intoxicated with OP | 16.___Has been hospitalized for OP poisoning | | | | | | |
| 26. If you are an applicator, name the pesticides you apply at work | | | Write the names here: | | | | | | |

**Appendix 2. Final structure of the exposure questionnaire with the items grouped in the four rotated factors.**

| **Factor 1: Labor conditions in the application of OP pesticides** |  | | | | | | | | | | | |
| --- | --- | --- | --- | --- | --- | --- | --- | --- | --- | --- | --- | --- |
| 1.- How long have you worked as an agricultural worker? | 0. ____10 years or less | | | | | | 1.____More than 10 years | | | | | |
| 2.-Are you currently working applying pesticides? | 1.____Yes | | | | | | 0.____No | | | | | |
| 3.-When was your last pesticide application? | 0.____Not applicable | | | | | | 1.____2 years or more | | | | | |
| 2.____Less than 2 years | | | | | |  | | | | | |
| 4.-Do you work mostly as a seasonal or  permanent pesticide applicator? (Check one) | 0.____Not applicable | | | | | | 1.____Seasonal | | | | | |
| 2.____Permanent | | | | | |  | | | | | |
| 5.-How many years have you applied pesticides? | 0.____Not applicable | | | | | | 1.____10 years or less | | | | | |
| 2.____More than 10 years | | | | | |  | | | | | |
| 6.-Do you have a pesticide applicator license? | 1.____Yes | | | | | | 0.____No | | | | | |
| 7.-Do you know the health risks you are exposed to when applying or mixing pesticides? | 1.____Yes | 2.____No | | | | | | | | | 0.____Not applicable | |
| 8.-Are you trained on the health risks of pesticides? | 1.____Yes | 2.____No | | | | | | | | | 0.____Not applicable | |
| 9.-Do you eat, drink or smoke during the application? | 1.____No | 2.____Yes or Occasionally | | | | | | | | | | 0.____Not applicable |
| 10.-During or after pesticide application, do you wash your hands before smoking, eating or drinking? | 1.____Yes | 2.____No or Occasionally | | | | | | | | | | 0.____Not applicable |
| 11.-What type of pesticide do you recall applying? (Can check more than one option)  (Internal code for answers rating: 0= Not applicable; 1= Only one OP pesticide; 2= More than one OP pesticide) | 0.____Not applicable OP | | | | | | 1.____Chlorpyrifos (Lorsban, Troya) | | | | | |
| 2.____Methamidophos (MTD 600, Monitor, Tamaron) | | | | | | 3.____Azinphosmethyl (Gusathion) | | | | | |
| 4.____Metidation | | | | | | 5.____Diazinon | | | | | |
| 6.____Phosmet | | | | | | 7.____Dimethoate | | | | | |
| 8.____Profenofos | | | | | | 9.____Cadusafos | | | | | |
| 10.____Other OP | | | (Name them): __________________ | | | | | | | | |
| 12.- Do you use manual pump backpack to apply OP pesticides? | 1.____Yes | | | | | | 0.____No or Not applicable | | | | | |
| 13. Do you use a motorized pump backpack to apply OP pesticides? | 1.____Yes | | | | | | 0.____No or Not applicable | | | | | |
| 14. Do you use a tractor operated nebulizer or pump to apply OP pesticides? | 1.____Yes | | | | | | 0.____No or Not applicable | | | | | |
| 15.-Where do you wash the machinery that was used to apply pesticides? (Check one option) | 0.____Does not wash, not applicable | | | | | | 1.____In a dedicated place for washing | | | | | |
| 2.____Yard, orchard, pasture or field | | | | | | 3.____Inside the house | | | | | |
| 16.-Where do you store the pesticides? (Check one option) | 0.____Not applicable | | | | | | 1.____Warehouse at home or work | | | | | |
| 2.____In the house’s yard | | | | | | 3.____Inside the house | | | | | |
| 17.-Besides applying OP pesticides, do you mix and prepare them? | 1.____Yes | | | | | | 0.____No or Not applicable | | | | | |
| 18.-The place where the pesticide is mixed is... | 0.____Not applicable | | | | 1.____Open | | | | | | | 2.____Closed |
| 19.-Do you wear personal protective equipment when mixing? | 0.____Not applicable | | | | 1.____Yes | | | | | | | 2.____No |
| 20.-Do you change your clothes after the application? | 1.____Yes | 2.____No or Occasionally | | | | | | | | | | 0.____Not applicable |
| 21.-If you change your clothes after work, where do you do it? (check one option) | 1.____Work | | 2.____Home | | | | | | | 0.____Not applicable | | |
| 22.-How long does it take between the end of the application and taking a shower or bath? (check one option) | 1.____Less than 15 minutes | | | | | | | 2.____15 minutes or mores | | | | |
| 0.____Not applicable | | | | | |  | | | | | |
| **Factor 2: Use of PPE**  In your work as an agricultural worker, check if you use the following Personal Protective Equipment (PPE): |  | | | | | | | | | | | |
| 23.-Use of PPE in hands (gloves) | 0.____Yes | | | | | | 1.____No | | | | | |
| 24.-Use of PPE in the head (hat) | 0.____Yes | | | | | | 1.____No | | | | | |
| 25.-Use of protective eyewear (googles, face shield or safety glasses) | 0.____Yes | | | | | | 1.____No | | | | | |
| 26.-Use of Respiratory PPE (Respiratory mask with recommended filters and facial protection) | 0.____Yes | | | | | | 1.____No | | | | | |
| 27.- Use of PPE in the body (Waterproof suit with no cuts or holes) | 0.____Yes | | | | | | 1.____No | | | | | |
| 28.-Use of PPE in the feet (rubber boot) | 0.____Yes | | | | | | 1.____No | | | | | |
| 29.-Frequency of use of PPE | 0.____Always | | | | | 1.____Never or occasionally | | | | | | |
| **Factor 3: Workplace conditions that prevent exposure to OP** |  | | | | | | | | | | | |
|  |  | | | | | | | | | | | |
| 30.- In our workplace we have showers | 0.____Yes | | | | | | 1.____No | | | | | |
| 31.- In our workplace we have washbasin | 0.____Yes | | | | | | 1.____No | | | | | |
| 32.- In our workplace we have hot water | 0.____Yes | | | | | | 1.____No | | | | | |
| 33.-In our workplace we have drinking water | 0.____Yes | | | | | | 1.____No | | | | | |
| 34.-In our workplace we have toilet | 0.____Yes | | | | | | 1.____No | | | | | |
| **Factor 4: Home conditions related to OP exposure** |  | | | | | | | | | | | |
| 35.-Do you have a greenhouse, orchard or field at home? | 0.____Yes | | | | | | 1.____No | | | | | |
| 36.-Approximate distance from farms to your house (in meters) (Check one option) | 0.____More than 500 meters | | | | | | | | 1.____500 meters or less | | | |
| 37.-Use organophosphate pesticides at home | 0.____Yes | | | | | | 1.____No | | | | | |
